# Supplementary material for: ATOMS (Adjustable Trans-Obturator Male System) in Patients with Post-Prostatectomy Incontinence and Previously Treated Urethral Stricture or Bladder Neck Contracture
Source: MDPI journal article supplement (doi:10.3390/jcm11164882), 2022-08-19
Supplement: s1 [file s1]

## SUPPLEMENTARY MATERIAL

**Table S1. Main characteristics of the 21 patients implanted with ATOMS and previous treatment of urethral stricture or bladder neck contracture.**

| Patient number | Previous Stricture location | Type of intervention  | Previous radiation | Severity of SUI | ICIQ-SF | Baseline 24-h pad-test (ml) | Age at ATOMS implant (years) | Number of adjustments | Final cushion volume (ml) | Post ATOMS 24-h pad-test (ml) |
|----------------|-----------------------------|-----------------------|--------------------|-----------------|---------|-----------------------------|------------------------------|-----------------------|---------------------------|-------------------------------|
| 5              | BLADDER NECK                | BLADDER NECK INCISION | YES                | SEVERE          | 21      | 900                         | 78                           | 3                     | 30                        | 40                            |
| 8              | BULBO-MEMBRANOUS            | URETHROPLASTY         | YES                | SEVERE          | 14      | 480                         | 69                           | 5                     | 37                        | 450                           |
| 22             | BLADDER NECK                | BLADDER NECK INCISION | NO                 | SEVERE          | 19      | 1225                        | 64                           | 3                     | 21                        | 5                             |
| 30             | BLADDER NECK                | BLADDER NECK INCISION | NO                 | SEVERE          | 20      | 1200                        | 64                           | 3                     | 24                        | 20                            |
| 50             | PENDULOUS                   | DVIU                  | NO                 | SEVERE          | 19      | 1200                        | 73                           | 3                     | 26                        | 230                           |
| 54             | BULBAR                      | DVIU                  | NO                 | SEVERE          | 14      | 650                         | 65                           | 2                     | 16                        | 0                             |
| 60             | PENDULOUS                   | DVIU                  | NO                 | MODERATE        | 14      | 648                         | 67                           | 2                     | 17                        | 90                            |
| 62             | BULBAR                      | URETHROPLASTY         | YES                | SEVERE          | 21      | 1800                        | 73                           | 4                     | 23.5                      | 280                           |
| 81             | BULBO-MEMBRANOUS            | URETHROPLASTY         | NO                 | SEVERE          | 19      | 980                         | 65                           | 3                     | 17                        | 70                            |
| 82             | BULBAR                      | URETHROPLASTY         | NO                 | SEVERE          | 21      | 1600                        | 71                           | 3                     | 21.5                      | 90                            |
| 90             | BULBO-MEMBRANOUS            | DVIU                  | NO                 | MODERATE        | 16      | 450                         | 68                           | 2                     | 14                        | 0                             |
| 91             | BULBAR                      | DVIU                  | NO                 | SEVERE          | 16      | 680                         | 78                           | 4                     | 20.5                      | 0                             |
| 96             | BULBO-MEMBRANOUS            | URETHROPLASTY         | YES                | MODERATE        | 18      | 635                         | 70                           | 2                     | 14                        | 0                             |
| 99             | BULBO-MEMBRANOUS            | URETHROPLASTY         | NO                 | SEVERE          | 20      | 950                         | 65                           | 3                     | 21                        | 120                           |
| 100            | BULBO-MEMBRANOUS            | URETHROPLASTY         | YES                | SEVERE          | 18      | 650                         | 66                           | 2                     | 16.5                      | 0                             |
| 101            | PENDULOUS                   | DVIU                  | NO                 | MODERATE        | 21      | 400                         | 58                           | 1                     | 14                        | 0                             |
| 112            | BLADDER NECK                | BLADDER NECK INCISION | YES                | SEVERE          | 18      | 1480                        | 83                           | 2                     | 17                        | 680                           |
| 114            | BULBO-MEMBRANOUS            | DVIU                  | YES                | SEVERE          | 21      | 1200                        | 71                           | 3                     | 16                        | 110                           |
| 116            | BULBO-MEMBRANOUS            | DVIU                  | YES                | SEVERE          | 21      | 980                         | 78                           | 3                     | 16                        | 180                           |
| 127            | PENDULOUS                   | DVIU                  | NO                 | SEVERE          | 14      | 650                         | 65                           | 1                     | 14                        | 0                             |
| 133            | BLADDER NECK                | BLADDER NECK INCISION | YES                | SEVERE          | 21      | 1300                        | 69                           | 3                     | 16                        | 180                           |
